# Supplementary material for: Impact of commonly administered drugs on the progression of spinal cord injury: a systematic review
Source: PubMed Central journal article supplement (PMC11502874; doi:10.1038/s43856-024-00638-0), 2024-10-24
Supplement: 43856_2024_638_MOESM3_ESM.pdf [file 43856_2024_638_MOESM3_ESM.pdf]

## Description of Additional Supplementary Files

**File name:** Supplementary Data 1.

**File description:** List of drugs included in analysis. Shaded rows highlight drugs tested in combination

**File name:** Supplementary Data 2.

**File description:** Neurological and functional outcomes for animal studies included in the review

**File name:** Supplementary Data 3.

**File description:** Variables extracted from studies included for analysis

**File name:** Supplementary Data 4.

**File description:** Bias assessment by animal experiment
